# Supplementary material
Source: publisher figshare collection journal article supplement (https://acs.figshare.com/ndownloader/files/27068842)
Supplement: Supplementary file 1 [file 27068842]

# Supporting Information (SI)

## Insights into the Ni/C-Based Thin-Film Catalyst Layer Design for Urea Oxidation Reaction in a Three-Electrode System

Nitul Kakati<sup>a</sup>, Guangfu Li<sup>a,b</sup>, and Po-Ya Abel Chuang<sup>a,\*</sup>

<sup>a</sup>*Department of Mechanical Engineering, University of California Merced, California 95343, United States*

<sup>b</sup>*Foshan Xianhu Laboratory of the Advanced Energy Science and Technology Guangdong Laboratory, Xianhu Hydrogen Valley, Foshan, 28200, China*

\*Corresponding Author: [abel.chuang@ucmerced.edu](mailto:abel.chuang@ucmerced.edu) (P. A. Chuang).

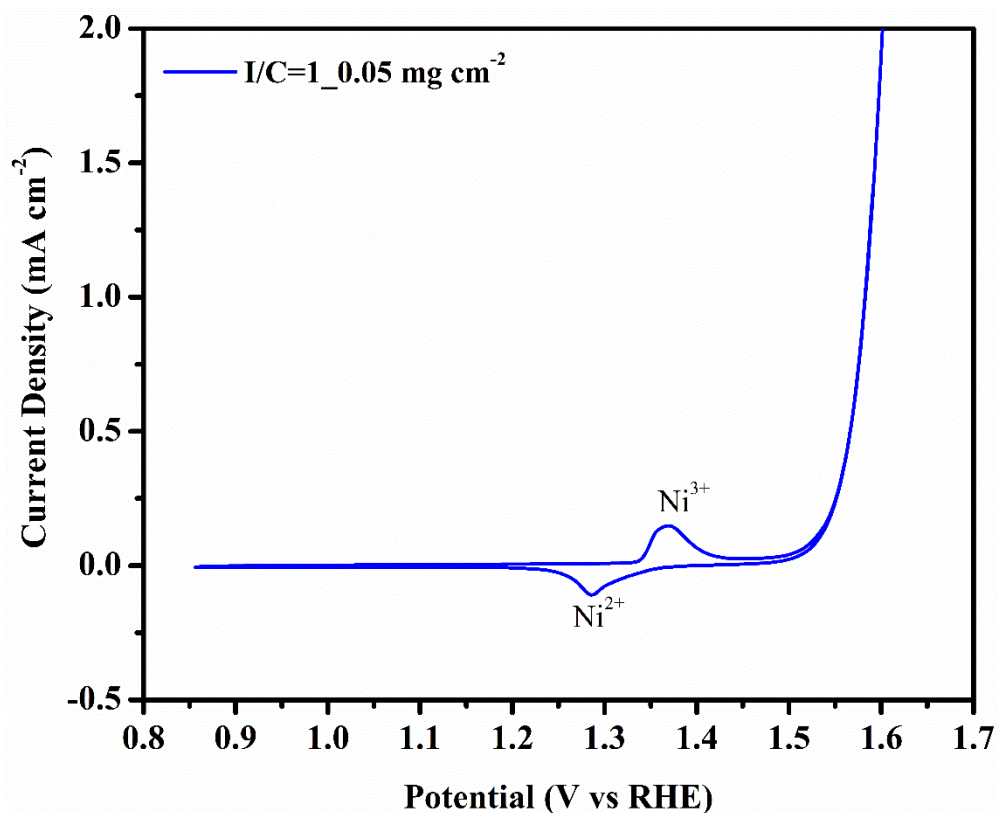

**Figure S1.** A sample CV curve obtained in 0.5 M KOH at a scan rate of  $10 \text{ mV s}^{-1}$  to calculate the ECSA of the catalyst layers.

The ECSA of the catalysts can be obtained by using the following formula [1]:  $\text{ECSA} = Q/0.257 \cdot m$  where  $Q$  (mC) is the charge consumed during the formation of a monolayer of  $\text{Ni}(\text{OH})_2$  that can be obtained from the integration of the area under the reduction peak, a charge of  $0.257 \text{ mC cm}^{-2}$  is required to reduce a monolayer of  $\text{NiOOH}$  to  $\text{Ni}(\text{OH})_2$  and  $m$  (mg) is the loading amount of the catalyst.

[1] N. Kakati, J. Maiti, K.S. Lee, B. Viswanathan, Y.S. Yoon, Hollow Sodium Nickel Fluoride Nanocubes Deposited MWCNT as An Efficient Electrocatalyst for Urea Oxidation, *Electrochim. Acta.* 240 (2017) 175–185. <https://doi.org/10.1016/j.electacta.2017.04.055>.

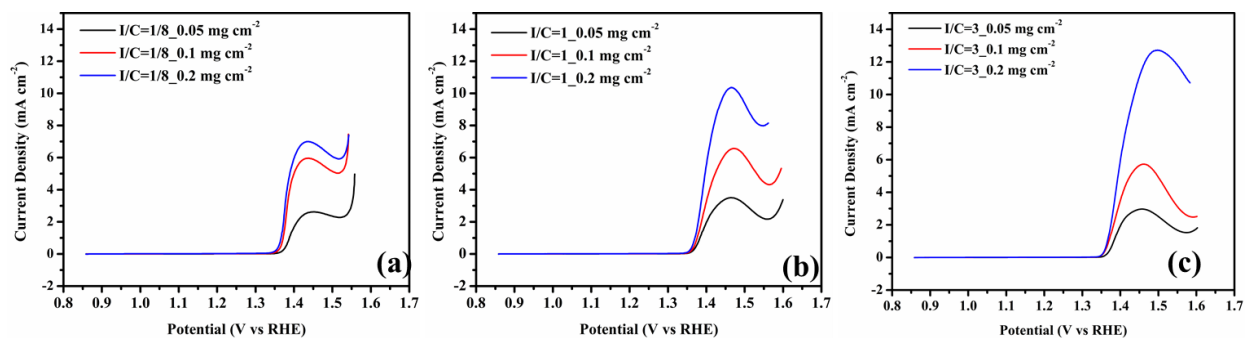

**Figure S2.** (a-c) LSV curves of CLs at different I/C ratio with different catalyst loading on the GCE obtained using 0.33 M urea in 0.5 M KOH at a scan rate of  $10 \text{ mV s}^{-1}$ .

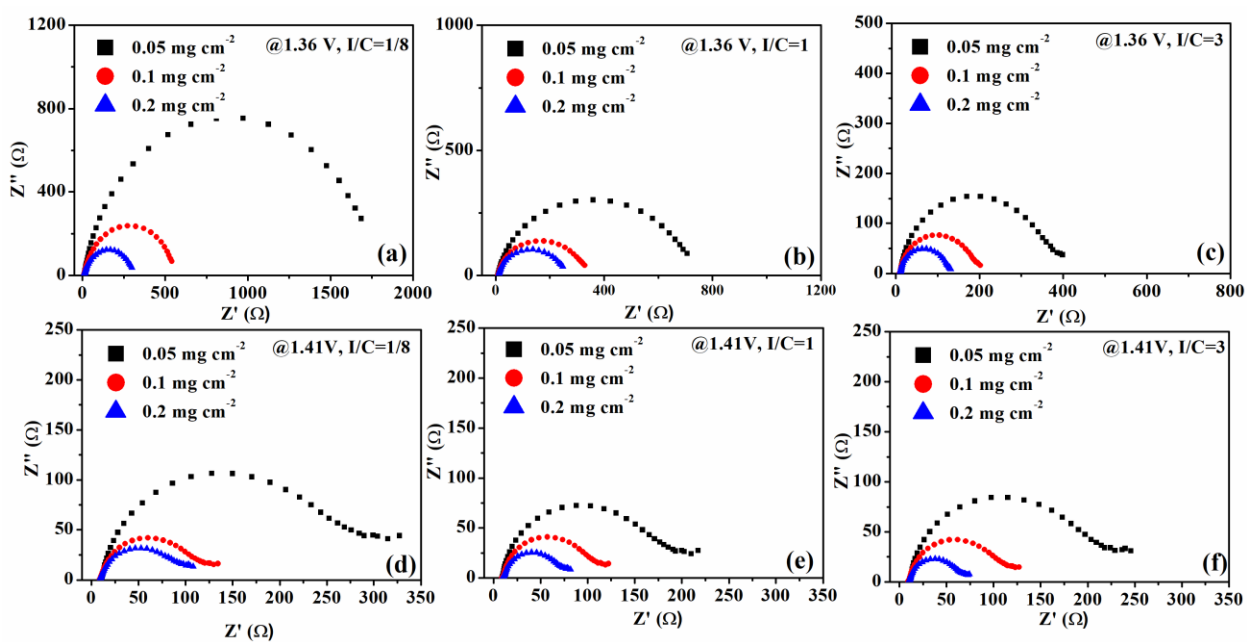

**Figure S3.** Electrochemical impedance spectra of the CLs at different I/C ratio with different catalyst loading on the GCE obtained using 0.33 M urea in 0.5 M KOH.

## EIS Simulation

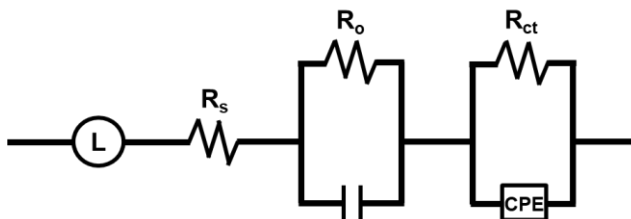

$R_s$  is a sign of the uncompensated solution resistance,  $R_{ct}$  is a charge transfer resistance generated from urea oxidation,  $R_o$  is related to the contact resistance between the catalyst material and the glassy carbon electrode and the constant phase element (CPE) for the double layer capacitance.

**Table S1** Fitted results for electrochemical impedance spectroscopy measurement for Ni/C catalyst at  $I/C = 1/8$  in 0.5 M KOH electrolyte with 0.33 M Urea.

|        | IPA/Water=3<br>/1<br>Loading(mg<br>cm <sup>-2</sup> ) | I/C=1/8, 0.33 M Urea + 0.5 M KOH |                    |                    |                       |                     |                          |               |
|--------|-------------------------------------------------------|----------------------------------|--------------------|--------------------|-----------------------|---------------------|--------------------------|---------------|
|        |                                                       | L (H)                            | $R_s$ ( $\Omega$ ) | $R_o$ ( $\Omega$ ) | $R_{ct}$ ( $\Omega$ ) | C (F)               | CPE (F s <sup>-1</sup> ) | $\alpha$      |
| 1.36 V | 0.05                                                  | -0.832E-6 ± 0.101E-6             | 9.93 ± 0.027       | 937.2 ± 41.6       | 855.02 ± 40.15        | 0.211E-3 ± 0.012E-3 | 0.450E-3 ± 0.043E-3      | 0.772 ± 0.012 |
|        | 0.1                                                   | -0.583E-6 ± 0.011E-6             | 8.732 ± 0.003      | 360.05 ± 2.45      | 211.5 ± 2.8           | 0.423E-3 ± 0.002    | 1.916E-3 ± 0.02E-3       | 0.671 ± 0.001 |
|        | 0.2                                                   | -0.776E-6 ± 0.147E-6             | 8.758 ± 0.04       | 168.85 ± 9.25      | 148.1 ± 8.7           | 0.731E-3 ± 0.051E-3 | 2.815E-3 ± 0.405E-3      | 0.645 ± 0.02  |
| 1.41 V | 0.05                                                  | -0.776E-6 ± 0.117E-6             | 10.05 ± 0.15       | 114.34 ± 52.06     | 216.05 ± 44.65        | 0.71E-2 ± 0.70E-2   | 1.40E-3 ± 1.18E-3        | 0.752 ± 0.129 |
|        | 0.1                                                   | -0.642E-6 ± 0.101E-6             | 8.837 ± 0.142      | 42.49 ± 20.54      | 89.83 ± 17.27         | 0.0232 ± 0.02       | 3.17E-3 ± 2.6E-3         | 0.712 ± 0.138 |
|        | 0.2                                                   | -0.633E-6 ± 0.075                | 8.812 ± 0.105      | 28.53 ± 10.11      | 77.49 ± 8.44          | 0.027 ± 0.02        | 2.86E-3 ± 2E-3           | 0.708 ± 0.103 |

**Table S2** Fitted results for electrochemical impedance spectroscopy measurement for Ni/C catalyst at I/C = 1 in 0.5 M KOH electrolyte with 0.33 M Urea.

|        | IPA/Water=<br>3/1<br>Loading(mg<br>cm <sup>-2</sup> ) | I/C=1, 0.33 M Urea + 0.5 M KOH |                    |                    |                     |                      |                          |               |
|--------|-------------------------------------------------------|--------------------------------|--------------------|--------------------|---------------------|----------------------|--------------------------|---------------|
|        |                                                       | L (H)                          | R <sub>s</sub> (Ω) | R <sub>o</sub> (Ω) | R <sub>ct</sub> (Ω) | C (F)                | CPE (F s <sup>-1</sup> ) | α             |
| 1.36 V | 0.05                                                  | -0.661E-6 ± 0.005E-6           | 9.115 ± 0.001      | 408.15 ± 2.85      | 318.2 ± 1           | 0.340E-3 ± 0.004     | 1.082E-3 ± 0.027E-3      | 0.755 ± 0.003 |
|        | 0.1                                                   | -0.593E-6 ± 0.003              | 9.16 ± 0.0015      | 253.2 ± 0.5        | 123.35 ± 7.25       | 0.535E-3 ± 0.016E-3  | 0.0115 ± 0.0005E-3       | 0.523 ± 0.008 |
|        | 0.2                                                   | -0.378E-6 ± 0.124E-6           | 9.346 ± 0.003      | 184.95 ± 0.75      | 102.3 ± 0.8         | 0.901E-3 ± 0.002E-3  | 0.0137 ± 0.0002E-3       | 0.486 ± 0.002 |
| 1.41 V | 0.05                                                  | -0.34E-6 ± 0.29E-6             | 9.09 ± 0.008       | 120.65 ± 0.15      | 100.05 ± 0.55       | 0.242E-3 ± 0.0005E-3 | 4.84E-3 ± 0.05E-3        | 0.628 ± 0.002 |
|        | 0.1                                                   | -0.5E-6 ± 0.078E-6             | 9.09 ± 0.0345      | 72.39 ± 2.69       | 59.4 ± 3.1          | 0.517E-3 ± 0.012E-3  | 0.015 ± 0.003E-3         | 0.479 ± 0.025 |
|        | 0.2                                                   | -0.42E-6 ± 0.07E-6             | 9.29 ± 0.044       | 40.21 ± 0.21       | 42.7 ± 0.73         | 4.63E-3 ± 4.6E-3     | 0.0145 ± 0.0005E-3       | 0.491 ± 0.007 |

**Table S3** Fitted results for electrochemical impedance spectroscopy measurement for Ni/C catalyst at I/C = 3 in 0.5 M KOH electrolyte with 0.33 M Urea.

|        | IPA/Wate<br>r=3/1<br>Loading(<br>mg cm <sup>-2</sup> ) | I/C=3, 0.33 M Urea + 0.5 M KOH |                    |                    |                     |                      |                          |               |
|--------|--------------------------------------------------------|--------------------------------|--------------------|--------------------|---------------------|----------------------|--------------------------|---------------|
|        |                                                        | L (H)                          | R <sub>s</sub> (Ω) | R <sub>o</sub> (Ω) | R <sub>ct</sub> (Ω) | C (F)                | CPE (F s <sup>-1</sup> ) | α             |
| 1.36 V | 0.05                                                   | -0.8276E-6 ± 0.094             | 10.34 ± 0.04       | 285.5 ± 4          | 141.9 ± 8.4         | 0.23E-3 ± 0.003 E-3  | 6.2 E-3 ± 0.91E-3        | 0.568 ± 0.022 |
|        | 0.1                                                    | -0.4065E-6 ± 0.375             | 9.33 ± 0.044       | 145.95 ± 1.45      | 79.5 ± 5.03         | 0.471E-3 ± 0.005E-3  | 0.017 ± 0.003            | 0.467 ± 0.02  |
|        | 0.2                                                    | -1.106E-6 ± 0.474E-6           | 9.58 ± 0.163       | 86.38 ± 7.12       | 43.4 ± 1.24         | 0.782E-3 ± 0.08E-3   | 0.02 ± 0.009             | 0.540 ± 0.11  |
| 1.41 V | 0.05                                                   | -1.075E-6 ± 0.176E-6           | 10.34 ± 0.01       | 145 ± 0.7          | 116.95 ± 3.15       | 0.221E-3 ± 0.001E-3  | 5.21E-3 ± 0.24           | 0.591 ± 0.007 |
|        | 0.1                                                    | 0.523E-6 ± 0.26E-6             | 9.361 ± 0.028      | 73.17 ± 0.76       | 69.65 ± 2.36        | 0.459E-3 ± 0.0025E-3 | 0.014 ± 0.002            | 0.5 ± 0.01    |
|        | 0.2                                                    | 0.056E-6 ± 0.08 E-6            | 9.47 ± 0.049       | 37.38 ± 1.14       | 37.51 ± 1.74        | 0.76E-3 ± 0.018E-3   | 0.017 ± 0.003            | 0.484 ± 0.03  |

**Table S4** Fitted results for electrochemical impedance spectroscopy measurement for Ni/C catalyst at I/C = 1 in 1.0 M KOH electrolyte with 0.33 M Urea.

|        | IPA/Water= 3/1<br>Loading(mg cm <sup>-2</sup> ) | I/C=1, 0.33 M Urea + 1 M KOH |                    |                    |                     |                                     |                          |               |
|--------|-------------------------------------------------|------------------------------|--------------------|--------------------|---------------------|-------------------------------------|--------------------------|---------------|
|        |                                                 | L (H)                        | R <sub>s</sub> (Ω) | R <sub>o</sub> (Ω) | R <sub>ct</sub> (Ω) | C (F)                               | CPE (F s <sup>-1</sup> ) | α             |
| 1.36 V | 0.05                                            | -0.197E-6 ± 0.187E-6         | 5.741 ± 0.007      | 294.55 ± 4.35      | 212.45 ± 2.95       | 0.343E-3 ± 0.014E-3                 | 0.911E-3 ± 0.074E-3      | 0.778 ± 0.009 |
|        | 0.1                                             | -0.389E-6 ± 0.0345E-6        | 5.631 ± 0.078      | 212 ± 30           | 107.5 ± 10.5        | 0.482E-3 ± 0.07E-3                  | 7.7E-3 ± 5.3E-3          | 0.657 ± 0.114 |
|        | 0.2                                             | -0.417E-6 ± 0.003E-6         | 5.80 ± 0.002       | 135.1 ± 0.4        | 56.81 ± 0.34        | 0.929E-3 ± 0.004E-3                 | 8.07E-3 ± 0.15E-3        | 0.637 ± 0.003 |
| 1.41 V | 0.05                                            | -0.425E-6 ± 0.051E-6         | 5.75 ± 0.006       | 94.89 ± 4.64       | 73.09 ± 3.09        | 0.244E-3 ± 0.01E-3                  | 4.265E-3 ± 1.085E-3      | 0.669 ± 0.027 |
|        | 0.1                                             | 0.406E-6 ± 0.026E-6          | 5.67 ± 0.02        | 50.305 ± 4.26      | 39.19 ± 1.15        | 0.455E-3 ± 0.431 ± 0.480 ± 0.025E-3 | 8.48E-3 ± 3.52E-3        | 0.67 ± 0.052  |
|        | 0.2                                             | -0.373E-6 ± 0.02E-6          | 5.80 ± 0.023       | 27.16 ± 0.635      | 25.135 ± 1.175      | 0.958E-3 ± 0.014E-3                 | 0.023 ± 0.004            | 0.525 ± 0.026 |

**Table S5** Fitted results for electrochemical impedance spectroscopy measurement for Ni/C catalyst at I/C = 1 in 3.0 M KOH electrolyte with 0.33 M Urea.

|        | IPA/Water= 3/1<br>Loading(mg cm <sup>-2</sup> ) | I/C=1, 0.33 M Urea + 3M KOH |                    |                    |                     |                     |                          |               |
|--------|-------------------------------------------------|-----------------------------|--------------------|--------------------|---------------------|---------------------|--------------------------|---------------|
|        |                                                 | L (H)                       | R <sub>s</sub> (Ω) | R <sub>o</sub> (Ω) | R <sub>ct</sub> (Ω) | C (F)               | CPE (F s <sup>-1</sup> ) | α             |
| 1.36 V | 0.05                                            | -0.15E-4 ± 0.005E-4         | 3.219 ± 0.007      | 56.15 ± 1.28       | 60.05 ± 1.11        | 0.337E-3 ± 0.01E-3  | 1.29E-3 ± 0.07E-3        | 0.747 ± 0.006 |
|        | 0.1                                             | -0.135E-4 ± 0.002E-4        | 3.193 ± 0.023      | 43.11 ± 1.37       | 30.2 ± 0.55         | 0.473E-3 ± 0.013E-3 | 9.5E-3 ± 1.5E-3          | 0.577 ± 0.023 |
|        | 0.2                                             | -0.154E-4 ± 0.001E-4        | 2.671 ± 0.025      | 16.045 ± 1.9       | 15.29 ± 1.58        | 1.17E-3 ± 0.17E-3   | 7.18E-3 ± 2.73E-3        | 0.67 ± 0.05   |
| 1.41 V | 0.05                                            | -0.152E-4 ± 0.001E-4        | 3.26 ± 0.06        | 34.77 ± 20         | 65.18 ± 18.5        | 0.017 ± 0.01        | 2.7E-3 ± 2.34E-3         | 0.768 ± 0.125 |
|        | 0.1                                             | -0.158E-4 ± 0.005E-4        | 3.255 ± 0.001      | 35.16 ± 0.04       | 35.99 ± 0.99        | 0.494E-3 ± 0.005E-3 | 9.53E-3 ± 0.13E-3        | 0.594 ± 0.014 |
|        | 0.2                                             | -0.155E-4 ± 0.0001E-4       | 2.763 ± 0.003      | 3.57 ± 0.026       | 21.39 ± 0.02        | 0.179 ± 0.01        | 1.51E-3 ± 0.05E-3        | 0.873 ± 0.002 |

**Table S6** Fitted results for electrochemical impedance spectroscopy measurement for Ni/C catalyst at I/C = 1 in 3.0 M KOH electrolyte with 0.1 M Urea.

|        | IPA/Water= 3/1<br>Loading(mg cm <sup>-2</sup> ) | I/C=1, 0.1 M Urea + 3M KOH |                    |                    |                     |                    |                          |               |
|--------|-------------------------------------------------|----------------------------|--------------------|--------------------|---------------------|--------------------|--------------------------|---------------|
|        |                                                 | L (H)                      | R <sub>s</sub> (Ω) | R <sub>o</sub> (Ω) | R <sub>ct</sub> (Ω) | C (F)              | CPE (F s <sup>-1</sup> ) | α             |
| 1.36 V | 0.05                                            | -0.298E-6 ± 0.13E-6        | 3.29 ± 0.01        | 55.63 ± 55.43      | 118.7 ± 47.23       | 0.294E-3 ± 0.06E-3 | 1.81E-3 ± 1.53E-3        | 0.805 ± 0.1   |
|        | 0.1                                             | -0.302E-6 ± 0.034E-6       | 2.694 ± 0.041      | 25.93 ± 16.38      | 43.12 ± 15.83       | 0.312E-3 ± 0.21E-3 | 6.85E-3 ± 6.1E-3         | 0.751 ± 0.15  |
|        | 0.2                                             | -0.216E-6 ± 0.03E-6        | 2.56 ± 0.04        | 17.12 ± 9.4        | 34.02 ± 8.5         | 0.065 ± 0.06       | 8.2E-3 ± 6.8E-3          | 0.738 ± 0.132 |
| 1.41 V | 0.05                                            | -0.326E-6 ± 0.023E-6       | 3.32 ± 0.03        | 243.2 ± 3.5        | 394.7 ± 11.9        | 2.709E-3 ± 2.44E-3 | 1.17E-3 ± 0.89E-3        | 0.835 ± 0.083 |
|        | 0.1                                             | -0.319E-6 ± 0.017E-6       | 2.73 ± 0.024       | 95.72 ± 3.8        | 167.95 ± 3.05       | 6.85E-3 ± 6.15E-3  | 2.69E-3 ± 2E-3           | 0.813 ± 0.09  |
|        | 0.2                                             | -0.25E-6 ± 0.01E-6         | 2.58 ± 0.016       | 51.16 ± 2.9        | 104.18 ± 8.62       | 8.8E-3 ± 7.25E-3   | 3.53E-3 ± 2.135E-3       | 0.818 ± 0.07  |

**Table S7** Fitted results for electrochemical impedance spectroscopy measurement for Ni/C catalyst at I/C = 1 in 3.0 M KOH electrolyte with 1.0 M Urea.

|        | IPA/Water= 3/1<br>Loading(mg cm <sup>-2</sup> ) | I/C=1, 1 M Urea + 3M KOH |                    |                    |                     |                  |                          |               |
|--------|-------------------------------------------------|--------------------------|--------------------|--------------------|---------------------|------------------|--------------------------|---------------|
|        |                                                 | L (H)                    | R <sub>s</sub> (Ω) | R <sub>o</sub> (Ω) | R <sub>ct</sub> (Ω) | C (F)            | CPE (F s <sup>-1</sup> ) | α             |
| 1.36 V | 0.05                                            | -0.329E-6 ± 0.05E-6      | 3.44 ± 0.06        | 56.22 ± 33         | 90.7 ± 31.7         | 0.019 ± 0.02     | 3.34E-3 ± 3.01E-3        | 0.759 ± 0.147 |
|        | 0.1                                             | -0.231E-6 ± 0.035E-6     | 2.79 ± 0.04        | 22.75 ± 13.6       | 36.74 ± 13.01       | 0.047 ± 0.04     | 7.8E-3 ± 7.2E-3          | 0.589 ± 0.005 |
|        | 0.2                                             | -0.0353E-6 ± 0.06E-6     | 4.204 ± 0.082      | 11.53 ± 7.42       | 20.03 ± 6.3         | 0.138 ± 0.1      | 0.02 ± 0.01              | 0.672 ± 0.2   |
| 1.41 V | 0.05                                            | -0.334E-6 ± 0.042E-6     | 3.446 ± 0.047      | 64.02 ± 21.95      | 106.69 ± 16.61      | 7.62E-3 ± 7.3E-3 | 2.75E-3 ± 2.45E-3        | 0.78 ± 0.13   |
|        | 0.1                                             | -0.233E-6 ± 0.03E-6      | 2.776 ± 0.034      | 26.11 ± 11.66      | 42.97 ± 9.8         | 0.023 ± 0.02     | 6.8E-3 ± 6.2E-3          | 0.76 ± 0.15   |
|        | 0.2                                             | -0.358E-6 ± 0.048E-6     | 4.211 ± 0.07       | 10.83 ± 5.8        | 20.12 ± 4.4         | 0.072 ± 0.07     | 0.016 ± 0.01             | 0.689 ± 0.183 |

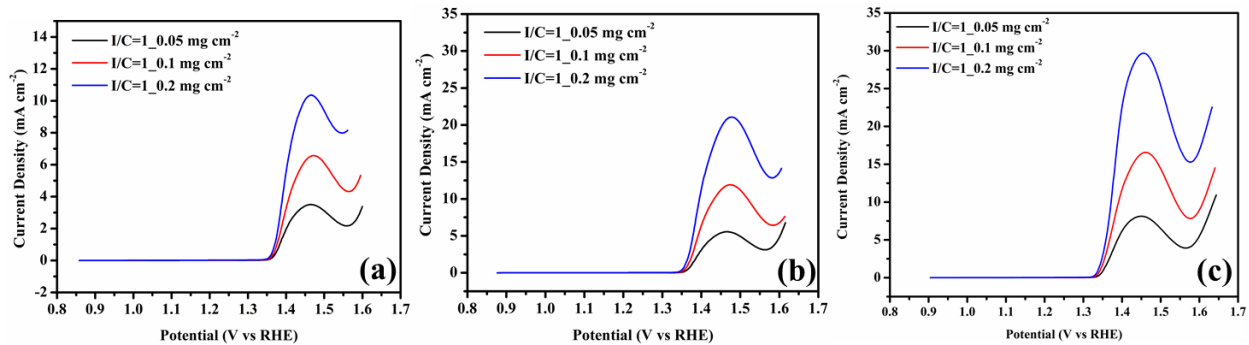

**Figure S4.** LSV curves of CLs at  $I/C=1$  with different catalyst loading on the GCE obtained using 0.33 M urea in (a) 0.5 M (b) 1 M and (c) 3 M KOH at a scan rate of  $10 \text{ mV s}^{-1}$ .

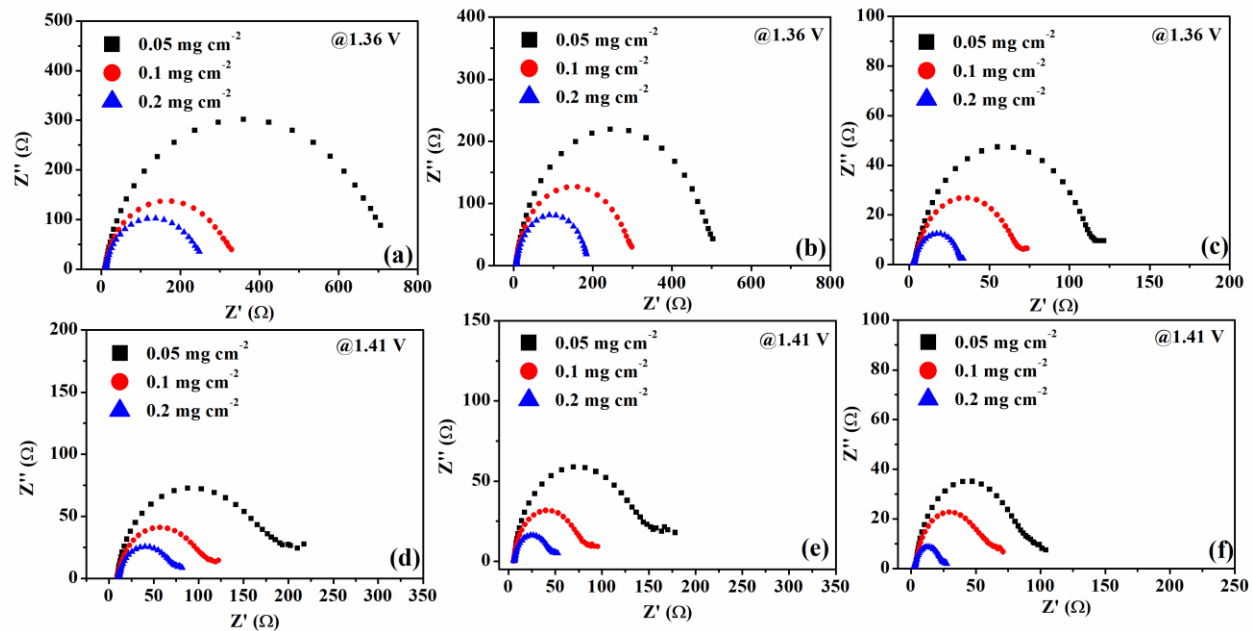

**Figure S5.** Electrochemical impedance spectra of the catalyst layers at  $I/C=1$  ratio with different catalyst loading on the GCE obtained using 0.33 M urea in (a, d) 0.5 M (b, e) 1 M and (c, f) 3 M KOH.



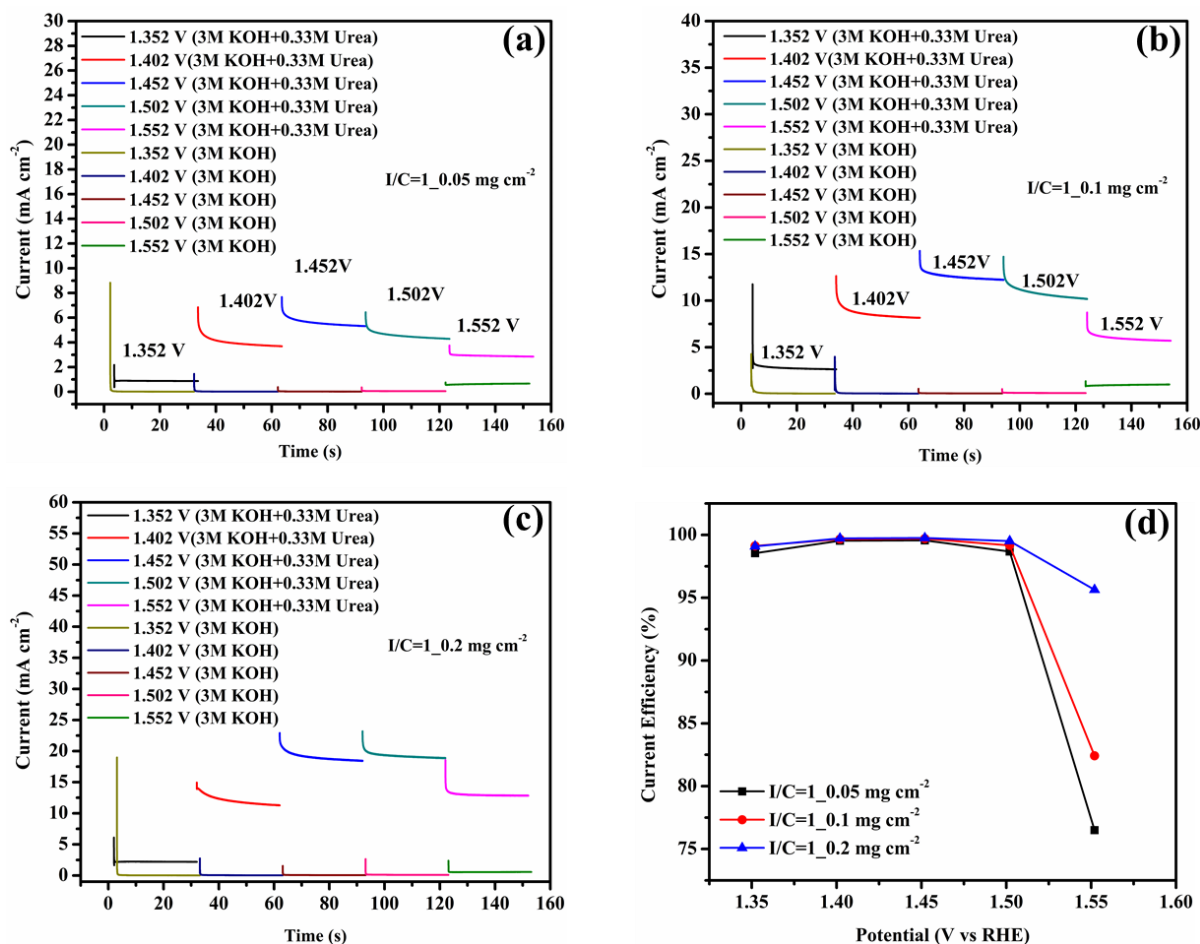

**Figure S6.** (a-c) Current density measured using step voltage method for the CLs at I/C=1 with different loading and (d) Measured Current Efficiency of the catalyst layers in 0.33 M urea in 3 M KOH.

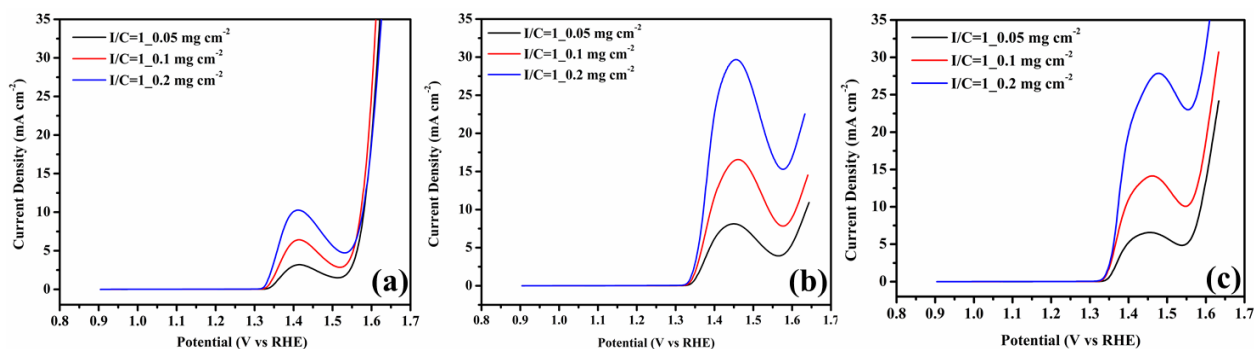

**Figure S7.** LSV curves of CLs at I/C = 1 with different catalyst loading on the GCE obtained in (a) 0.1 M (b) 0.33 M and (c) 1 M urea in 3 M KOH at a scan rate of 10 mV s<sup>-1</sup>.

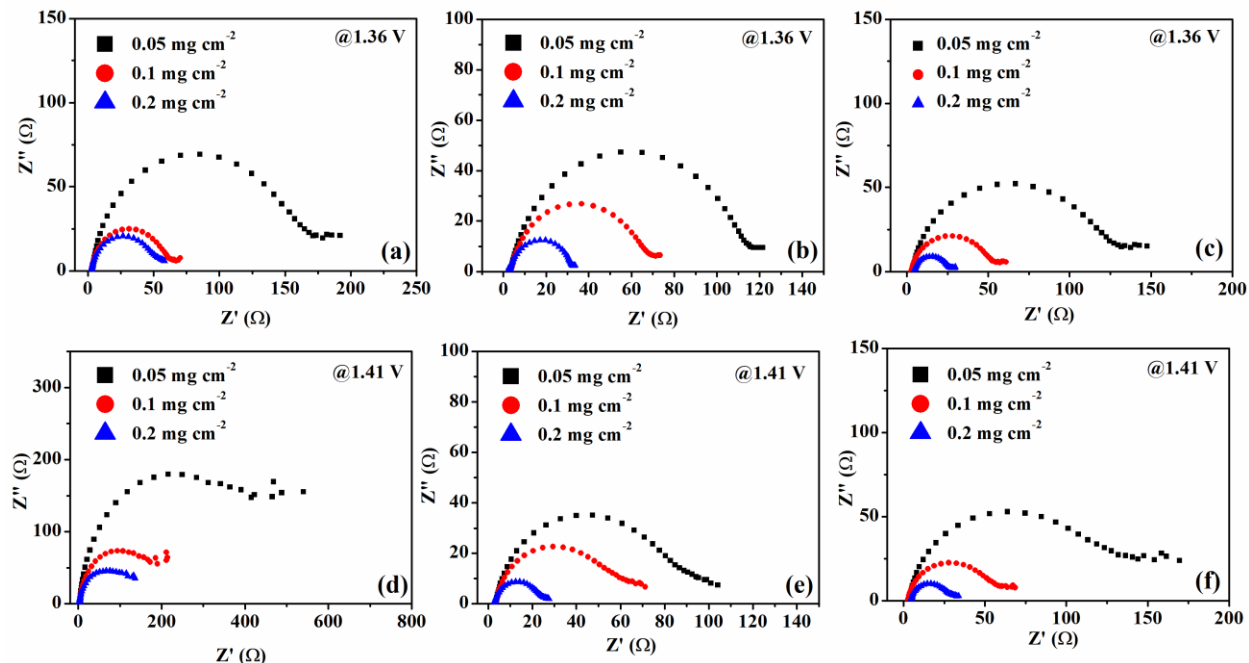

**Figure S8.** Electrochemical impedance spectra of the catalyst layers at I/C=1 ratio with different catalyst loading on the GCE obtained in (a, d) 0.1 M (b, e) 0.33 M and (c, f) 1 M urea in 3 M KOH.

**Table S8:** Potential (V vs RHE) at 10 mA mg<sup>-1</sup> and 200 mA mg<sup>-1</sup> for different catalyst layer compositions in urea in KOH solution.

| Loading<br>(mg cm <sup>-2</sup> ) | 0.5 M KOH + 0.33 M Urea            |       |       | 1 M KOH +<br>0.33 M Urea              | 3 M KOH +<br>0.33 M Urea              | 3 M KOH +<br>0.1 M Urea               | 3 M KOH + 1<br>M Urea                 |
|-----------------------------------|------------------------------------|-------|-------|---------------------------------------|---------------------------------------|---------------------------------------|---------------------------------------|
|                                   | V vs RHE @ 10 mA mg <sup>-1</sup>  |       |       | V vs RHE @<br>10 mA mg <sup>-1</sup>  |
|                                   | I/C=1/8                            | I/C=1 | I/C=3 | I/C=1                                 | I/C=1                                 | I/C=1                                 | I/C=1                                 |
| 0.05                              | 1.362                              | 1.358 | 1.356 | 1.350                                 | 1.332                                 | 1.332                                 | 1.334                                 |
| 0.1                               | 1.357                              | 1.359 | 1.353 | 1.351                                 | 1.330                                 | 1.327                                 | 1.330                                 |
| 0.2                               | 1.358                              | 1.360 | 1.358 | 1.351                                 | 1.331                                 | 1.324                                 | 1.333                                 |
| Loading<br>(mg cm <sup>-2</sup> ) | V vs RHE @ 200 mA mg <sup>-1</sup> |       |       | V vs RHE @<br>200 mA mg <sup>-1</sup> |
|                                   | I/C=1/8                            | I/C=1 | I/C=3 | I/C=1                                 | I/C=1                                 | I/C=1                                 | I/C=1                                 |
|                                   | I/C=1/8                            | I/C=1 | I/C=3 | I/C=1                                 | I/C=1                                 | I/C=1                                 | I/C=1                                 |
| 0.05                              | 1.406                              | 1.399 | 1.399 | 1.384                                 | 1.362                                 | 1.372                                 | 1.364                                 |
| 0.1                               | 1.387                              | 1.406 | 1.404 | 1.384                                 | 1.361                                 | 1.366                                 | 1.361                                 |
| 0.2                               | -                                  | 1.415 | 1.412 | 1.386                                 | 1.366                                 | 1.373                                 | 1.368                                 |

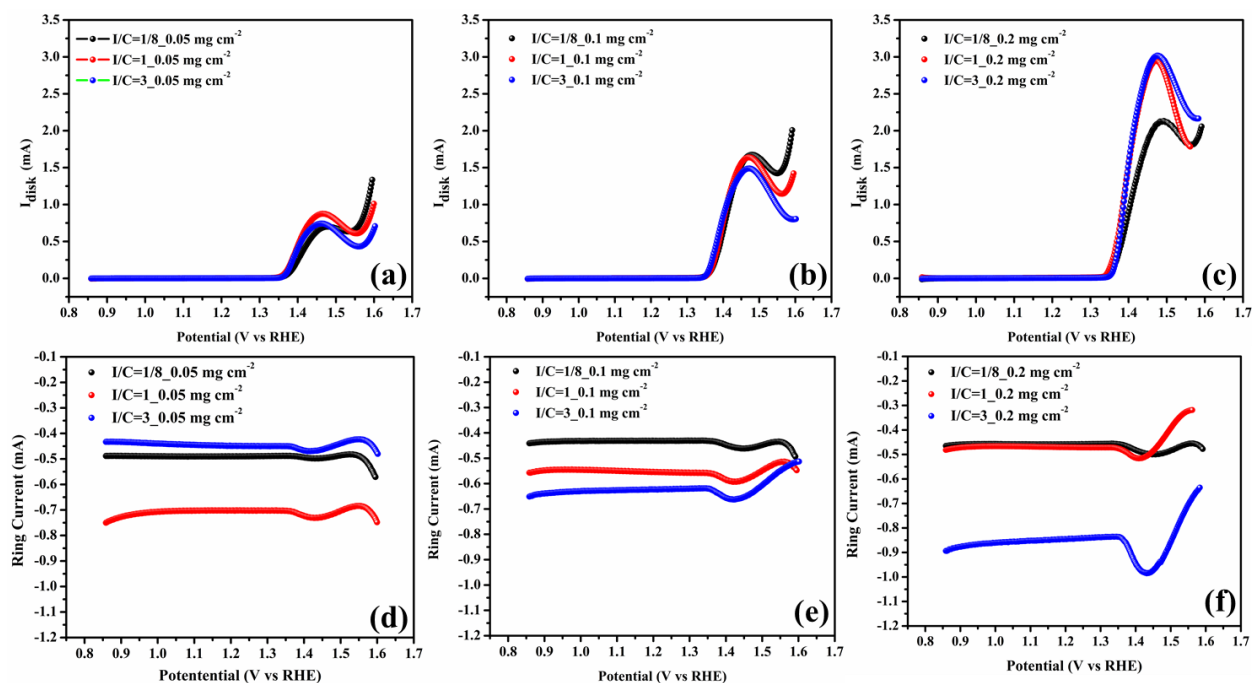

**Figure S9.** RRDE results showing the (a-c) disk current and the corresponding (d-f) ring current with different I/C ratios and catalyst loadings in 0.33 M urea and 0.5 M KOH.

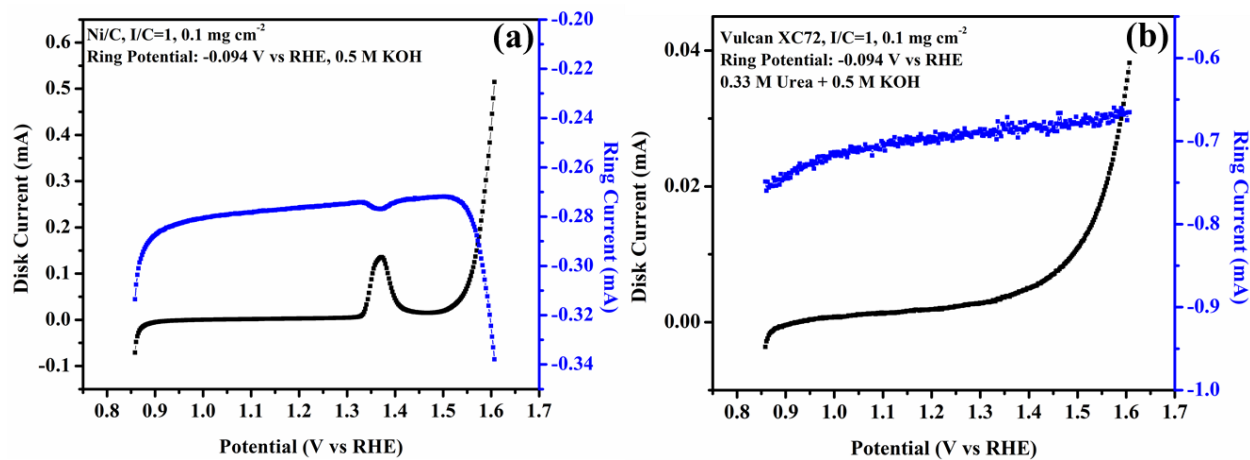

**Fig. S10.** RRDE results of the disk current and the corresponding ring current of (a) Ni on Vulcan XC 72 in 0.5 M KOH solution and (b) Vulcan XC 72 in 0.33 M urea in 0.5 M KOH at a scan rate of  $20 \text{ mV s}^{-1}$  and ring potential of  $-0.094 \text{ V}$ .

**RRDE study: Derivation of OH<sup>-</sup> activity change using Butler-Volmer kinetic equation.**

$$i_1 = i_0 \times rf \times \left[ e^{\alpha n F \eta / RT} - \left( \frac{a_{1,H_2}}{a_{H_2}^*} \right)^{0.5} \left( \frac{a_{1,OH^-}}{a_{OH^-}^*} \right) e^{-(1-\alpha)n F \eta / RT} \right] \quad (S1)$$

$$i_2 = i_0 \times rf \times \left[ e^{\alpha n F \eta / RT} - \left( \frac{a_{2,H_2}}{a_{H_2}^*} \right)^{0.5} \left( \frac{a_{2,OH^-}}{a_{OH^-}^*} \right) e^{-(1-\alpha)n F \eta / RT} \right] \quad (S2)$$

$$\frac{i_2}{i_1} = \frac{\left[ 1 - \left( \frac{a_{2,OH^-}}{a_{OH^-}^*} \right) e^{-n F \eta / RT} \right]}{\left[ 1 - \left( \frac{a_{1,OH^-}}{a_{OH^-}^*} \right) e^{-n F \eta / RT} \right]} \text{ where } \left( \frac{a_{1,H_2}}{a_{H_2}^*} \right) = \left( \frac{a_{2,H_2}}{a_{H_2}^*} \right) = 1 \quad (S3)$$

$$e^{-n F \eta / RT} = 0.026 \quad (n = 1, \eta = 0.094 \text{ V}, T = 25^\circ\text{C}) \quad (S4)$$

$$\frac{i_2}{i_1} = \frac{\left[ 1 - 0.026 a_{2,OH^-} \right]}{\left[ 1 - 0.026 a_{1,OH^-} \right]} \text{ where } a_{OH^-}^* = 1 \quad (S5)$$

$$\frac{i_2}{i_1} - \frac{i_2}{i_1} (0.026 a_{1,OH^-}) = 1 - 0.026 a_{2,OH^-} \quad (S6)$$

$$a_{2,OH^-} = \frac{\left[ \frac{i_2}{i_1} (0.026 a_{1,OH^-}) - \frac{i_2}{i_1} + 1 \right]}{0.026} \quad (S7)$$
